# Supplementary material for: Improving Influenza Vaccination Coverage in Patients with Cancer: A Position Paper from a Multidisciplinary Expert Group
Source: MDPI journal article supplement (doi:10.3390/vaccines12040420), 2024-04-16
Supplement: s1 [file s1]

**Table S1.** Agendas for two web-based meetings regarding strategies for improving influenza vaccination coverage in patients with cancer in Italy.

| Meeting   | Time              | Topic                                                                                                                                                                                                                                                                 |
|-----------|-------------------|-----------------------------------------------------------------------------------------------------------------------------------------------------------------------------------------------------------------------------------------------------------------------|
| Meeting 1 | 4:00 pm – 4:20 pm | Welcome and Introduction                                                                                                                                                                                                                                              |
|           | 4:20 pm – 4:40 pm | Overview of the National Vaccination plan                                                                                                                                                                                                                             |
|           | 4:40 pm – 5:00 pm | National strategy for influenza vaccination                                                                                                                                                                                                                           |
|           | 5:00 pm – 5:40 pm | What to do for the cancer patient?<br>– AIOM recommendations<br>– Discussion                                                                                                                                                                                          |
|           | 5:40 pm – 6:10 pm | Cancer patient and current barriers: how to overcome them?<br>– Best practice sharing-network – examples?<br>– Special populations:<br>• Hematology or immunocompromised patients<br>• Immune oncology (monoclonal antibodies or cell therapies)<br>• COVID landscape |
|           | 6:10 pm – 6:50 pm | Proposals for a draft action plan                                                                                                                                                                                                                                     |
|           | 6:50 pm – 7:00 pm | Conclusions and next steps                                                                                                                                                                                                                                            |
| Meeting 2 | 4:00 pm – 4:10 pm | Welcome and Introduction                                                                                                                                                                                                                                              |
|           | 4:10 pm – 4:30 pm | Best practices sharing-network – examples?                                                                                                                                                                                                                            |
|           | 4:30 pm – 5:30 pm | What actions to take to improve awareness of the importance of influenza vaccination among cancer patients (round table discussion)                                                                                                                                   |
|           | 5:30 pm – 6:00 pm | Other areas of collaboration between the company and stakeholders: data generation<br>Overview of clinical data on recombinant influenza vaccine                                                                                                                      |
|           | 6:00 pm – 6:50 pm | Discussion                                                                                                                                                                                                                                                            |
|           | 6:50 pm – 7:00 pm | Concluding notes and next steps                                                                                                                                                                                                                                       |

AIOM, Associazione Italiana di Oncologia Medica (Italian Association of Medical Oncology).
